# Supplementary material for: Attributable Fraction of Cancer Related to Occupational Exposure in Italy
Source: MDPI journal article supplement (doi:10.3390/cancers15082234), 2023-04-10
Supplement: s1 [file s1]

Supplementary Table S1. Agents classified as established carcinogens excluded from the analysis

| <b>Agents or mixtures</b>                            | <b>Reason for exclusion</b>                                   |
|------------------------------------------------------|---------------------------------------------------------------|
| Aromatic amines                                      | No exposures in recent decades                                |
| Painters                                             | No estimate of proportion of exposed workers                  |
| Welding fumes                                        | No estimate of proportion of exposed workers                  |
| Talc containing asbestiform fibres                   | No estimate of proportion of exposed workers                  |
| Iron and steel foundry                               | No estimate of proportion of exposed workers                  |
| Rubber                                               | No estimate of proportion of exposed workers                  |
| Beryllium                                            | No exposures in recent decades                                |
| Coal tars and pitches                                | Included in polycyclic aromatic hydrocarbons                  |
| Shale oils                                           | Included in polycyclic aromatic hydrocarbons                  |
| Soots                                                | Included in polycyclic aromatic hydrocarbons                  |
| Vinyl chloride                                       | No exposure in recent decades                                 |
| Bis(chloromethyl)ether and chloromethyl methyl ether | No exposure in recent decades                                 |
| 4-Aminobiphenyl                                      | Included in aromatic amines                                   |
| Benzidine                                            | Included in aromatic amines                                   |
| 2-Napththylamine                                     | Included in aromatic amines                                   |
| Ethylene oxide                                       | Evidence for an association in humans is less than sufficient |
| Mustard gas                                          | No exposure in recent decades                                 |
| <b>Exposure circumstances</b>                        |                                                               |
| Aluminium production                                 | Included in polycyclic aromatic hydrocarbons                  |
| Auramine manufacture                                 | Included in aromatic amines                                   |
| Boot and shoe manufacture and repair                 | Included in leather dust                                      |
| Coal gasification                                    | Included in polycyclic aromatic hydrocarbons                  |
| Coke production                                      | Included in polycyclic aromatic hydrocarbons                  |
| Furniture and cabinet making                         | Included in wood dust                                         |
| Hematite mining, underground, with radon exposure    | Included in radon                                             |
| Iron and steel founding                              | Included in polycyclic aromatic hydrocarbons and silica       |
| Isopropanol manufacture                              | No exposure in recent decades                                 |
| Magenta manufacture                                  | Included in aromatic amines                                   |
